# Supplementary material for: Health facility data for monitoring of maternal, newborn and health indicators: a systematic approach applied by 32 countries in sub-Saharan Africa
Source: Research Square preprint supplement (doi:10.21203/rs.3.rs-8505093/v1), 2026-01-29
Supplement: Supplementary file 1 [file 0c781cb92ca6ccda6c974a71.docx]

**Table 1: Overall data quality**

| **Country** | **2020** | **2021** | **2022** | **2023** | **2024** |
| --- | --- | --- | --- | --- | --- |
| Angola | 57 | 67 | 72 | 70 | 77 |
| Benin | 91 | 94 | 93 | 93 | 93 |
| Burkina Faso | 85 | 89 | 85 | 85 | 79 |
| Cabo Verde | 82 | 82 | 76 | 75 | 77 |
| Cameroon | 72 | 77 | 77 | 78 | 77 |
| CAR | * | * | 59 | 64 | 68 |
| Chad | 81 | 82 | 67 | 71 | 58 |
| Cote d’Ivoire | 88 | 79 | 86 | 81 | 80 |
| DRC | 91 | 88 | 91 | 90 | 89 |
| Ethiopia | 84 | 84 | 85 | 82 | 87 |
| Gambia | 77 | 71 | 74 | 72 | 71 |
| Ghana | 72 | 69 | 70 | 69 | 69 |
| Guinea-Bissau | 62 | 64 | 62 | 63 | 60 |
| Guinea | 93 | 91 | 93 | 89 | 84 |
| Kenya | 93 | 95 | 92 | 94 | 88 |
| Liberia | 91 | 91 | 84 | 73 | 85 |
| Madagascar | 72 | 83 | 82 | 76 | 80 |
| Malawi | 70 | 81 | 85 | 84 | 80 |
| Mali | 84 | 84 | 82 | 85 | 82 |
| Mozambique | 87 | 81 | 80 | 84 | 84 |
| Niger | 83 | 84 | 83 | 85 | 85 |
| Nigeria | 67 | 68 | 72 | 78 | 78 |
| Rwanda | 92 | 92 | 91 | 84 | 86 |
| Senegal | 71 | 70 | 60 | 57 | 63 |
| Sierra Leone | 84 | 82 | 78 | 71 | 79 |
| Somalia | * | * | 52 | 67 | 65 |
| South Sudan | 59 | 62 | 60 | 58 | 59 |
| Tanzania | 88 | 85 | 87 | 84 | 84 |
| Togo | 80 | 79 | 82 | 79 | 79 |
| Uganda | 91 | 91 | 90 | 88 | 79 |
| Zambia | 89 | 92 | 91 | 91 | 84 |
| Zimbabwe | 92 | 89 | 86 | 88 | 74 |
| **Median** | **84** | **82** | **82** | **80** | **79** |
| **Quartile-1** | **72** | **71** | **72** | **71** | **73** |
| **Quartile-3** | **90** | **89** | **86** | **85** | **84** |
| ***Data not available** | | | | | |

**Table 2: Reporting completeness**

| **Country** | **2020** | **2021** | **2022** | **2023** | **2024** |
| --- | --- | --- | --- | --- | --- |
| Angola | 21 | 49 | 84 | 98 | 100 |
| Benin | 96 | 97 | 98 | 98 | 98 |
| Burkina Faso | 93 | 94 | 89 | 89 | 83 |
| Cabo Verde | 100 | 100 | 100 | 100 | 100 |
| Cameroon | 90 | 93 | 94 | 96 | 98 |
| CAR | * | * | 54 | 74 | 85 |
| Chad | 96 | 96 | 72 | 83 | 89 |
| Cote d’Ivoire | 100 | 99 | 100 | 99 | 100 |
| DRC | 96 | 96 | 98 | 99 | 99 |
| Ethiopia | 89 | 87 | 86 | 88 | 90 |
| Gambia | 82 | 77 | 77 | 85 | 91 |
| Ghana | 92 | 93 | 95 | 96 | 97 |
| Guinea-Bissau | * | * | * | * | * |
| Guinea | 98 | 96 | 99 | 99 | 100 |
| Kenya | 96 | 96 | 97 | 97 | 97 |
| Liberia | 98 | 97 | 98 | 96 | 99 |
| Madagascar | 84 | 94 | 96 | 93 | 99 |
| Malawi | 83 | 91 | 95 | 95 | 97 |
| Mali | 96 | 96 | 95 | 97 | 95 |
| Mozambique | 91 | 91 | 92 | 93 | 95 |
| Niger | 96 | 98 | 99 | 99 | 99 |
| Nigeria | 82 | 79 | 86 | 92 | 93 |
| Rwanda | 99 | 99 | 99 | 99 | 99 |
| Senegal | 86 | 86 | 74 | 61 | 67 |
| Sierra Leone | 95 | 95 | 93 | 94 | 98 |
| Somalia | * | * | 68 | 92 | 92 |
| South Sudan | 56 | 65 | 63 | 68 | 68 |
| Tanzania | 92 | 87 | 89 | 95 | 96 |
| Togo | 99 | 99 | 98 | 97 | 99 |
| Uganda | 97 | 97 | 97 | 97 | 87 |
| Zambia | 96 | 98 | 99 | 99 | 99 |
| Zimbabwe | 94 | 92 | 94 | 96 | 96 |
| **Median** | **95** | **95** | **95** | **96** | **97** |
| **Quartile-1** | **89** | **91** | **86** | **92** | **92** |
| **Quartile-3** | **96** | **97** | **98** | **98** | **99** |
| ***Data not available** | | | | | |

**Table 3: ANC1 to Penta-1 ratio**

| **Country** | **2020** | **2021** | **2022** | **2023** | **2024** |
| --- | --- | --- | --- | --- | --- |
| Angola | 0.151039 | 0.010501 | 0.085778 | 0.054744 | 0.024353 |
| Benin | 0.325289 | 0.30041 | 0.365114 | 0.324358 | 0.342817 |
| Burkina Faso | 0.025006 | 0.000846 | 0.021182 | 0.050733 | 0.028826 |
| Cabo Verde | 0.048314 | 0.068369 | 0.113281 | 0.150986 | 0.133704 |
| Cameroon | 0.214769 | 0.157785 | 0.17964 | 0.280508 | 0.312291 |
| CAR | * | * | 1.817865 | 1.174273 | 0.728503 |
| Chad | 1.081031 | 1.081031 | 0.133489 | 0.152986 | 0.127018 |
| Cote dIvoire | 0.128057 | 0.389869 | 0.131954 | 0.195386 | 0.232175 |
| DRC | 0.046951 | 0.086329 | 0.022734 | 0.062208 | 0.031478 |
| Ethiopia | 0.003127 | 0.026135 | 0.032208 | 0.026806 | 0.028906 |
| Gambia | 0.026269 | 0.072482 | 0.109384 | * | * |
| Ghana | 0.219054 | 0.261465 | 0.277321 | 0.306975 | 0.318204 |
| Guinea-Bissau | 0.752072 | * | * | 0.121206 | 1.773412 |
| Guinea | 0.094855 | 0.133351 | 0.182995 | 0.127121 | 0.100989 |
| Kenya | 0.024869 | 0.001668 | 0.024758 | 0.020039 | 0.028823 |
| Liberia | 0.031289 | 0.02445 | 0.070884 | 0.198059 | 0.097263 |
| Madagascar | 0.127206 | 0.029766 | 0.101557 | 0.157471 | 0.159622 |
| Malawi | 0.491967 | 0.255435 | 0.01408 | 0.038802 | 0.061352 |
| Mali | 0.110673 | 0.041191 | 0.101425 | 0.008636 |  |
| Mozambique | 0.331106 | 0.705209 | 0.649617 | 0.43171 | 0.346871 |
| Niger | 0.150873 | 0.142685 | 0.228207 | 0.166782 | 0.131636 |
| Nigeria | 0.38997 | 0.351705 | 0.3811 | 0.373831 | 0.384893 |
| Rwanda | 0.030778 | 0.059523 | 0.058952 | 0.006981 | 0.055185 |
| Senegal | 0.503308 | 0.43754 | 0.451352 | 0.471927 | 0.481847 |
| Sierra Leone | 0.075105 | 0.098499 | 0.052948 | 0.134183 | 0.146188 |
| Somalia | * | * | * | * | * |
| South Sudan | 0.257715 | 0.291467 | 0.299669 | 0.337027 | 0.297808 |
| Tanzania | 0.148908 | 0.110125 | 0.054862 | 0.025675 | 0.033922 |
| Togo | 0.318036 | 0.323141 | 0.284418 | 0.288988 | 0.25727 |
| Uganda | 0.032003 | 0.00347 | 0.002221 | 0.000353 | 0.057968 |
| Zambia | 0.116572 | 0.066371 | 0.062999 | 0.081313 | 0.036966 |
| Zimbabwe | 0.059973 | 0.011978 | 0.025581 | 0.036401 | 0.129788 |
| **Median** | **0.127206** | **0.104312** | **0.10547** | **0.142585** | **0.131636** |
| **QR1** | **0.044172** | **0.032622** | **0.053426** | **0.041785** | **0.055185** |
| **QR2** | **0.287875** | **0.298174** | **0.265042** | **0.286868** | **0.312291** |
| ***Data not available and in some cases ANC-1 data was not available** | | | | | |

**Table 4: Average percentage of the districts with no extreme outliers in 13 key tracer indicators**

| **Country** | **2020** | **2021** | **2022** | **2023** | **2024** |
| --- | --- | --- | --- | --- | --- |
| Angola | 100 | 99 | 100 | 100 | 100 |
| Benin | 100 | 100 | 100 | 100 | 100 |
| Burkina Faso | 92 | 100 | 100 | 100 | 99 |
| Cabo Verde | 99 | 100 | 92 | 92 | 98 |
| Cameroon | 99 | 100 | 99 | 100 | 99 |
| CAR | * | * | 100 | 100 | 99 |
| Chad | 100 | 100 | 100 | 100 | 67 |
| Cote dIvoire | 100 | 100 | 100 | 100 | 100 |
| DRC | 99 | 100 | 100 | 100 | 100 |
| Ethiopia | 100 | 100 | 99 | 100 | 100 |
| Gambia | 99 | 100 | 100 | 99 | 99 |
| Ghana | 99 | 100 | 100 | 100 | 100 |
| Guinea-Bissau | 74 | 95 | 97 | 100 | 96 |
| Guinea | 100 | 100 | 83 | 67 | 69 |
| Kenya | 98 | 100 | 100 | 100 | 100 |
| Liberia | 99 | 99 | 97 | 71 | 99 |
| Madagascar | 100 | 100 | 98 | 92 | 90 |
| Malawi | 99 | 100 | 92 | 91 | 87 |
| Mali | 100 | 100 | 100 | 99 | 99 |
| Mozambique | 100 | 100 | 99 | 100 | 98 |
| Niger | 100 | 100 | 92 | 92 | 92 |
| Nigeria | 94 | 99 | 100 | 100 | 99 |
| Rwanda | 100 | 100 | 100 | 100 | 99 |
| Senegal | 100 | 100 | 100 | 100 | 100 |
| Sierra Leone | 100 | 100 | 99 | 97 | 98 |
| Somalia | * | * | 54 | 48 | 46 |
| South Sudan | 100 | 100 | 100 | 99 | 99 |
| Tanzania | 99 | 100 | 100 | 100 | 99 |
| Togo | 100 | 100 | 99 | 100 | 99 |
| Uganda | 100 | 100 | 100 | 100 | 98 |
| Zambia | 100 | 100 | 100 | 100 | 100 |
| Zimbabwe | 99 | 100 | 100 | 100 | 90 |
| Indicators considered: First-trimester antenatal care visits, first antenatal care (ANC-1) visits, fourth antenatal care (ANC-4) visits, BCG vaccinations, caesarean section deliveries, institutional deliveries, institutional live births, total inpatient department visits, inpatient department visits among children under five, total outpatient department visits, outpatient department visits among children under five, first dose pentavalent vaccination (Penta-1), third dose pentavalent vaccination (Penta-3) | | | | | |

**Table 5: Assessing the effect of adjustment (Year 2024)**

| Country | ANC1-unadj | | ANC1-adj | | ANC1-adj/ ANC1-unadj | | Penta1-unadj | | Penta1-adj | | Penta1-adj/ Penta1-unadj | | inst-unadj | | inst-adj | | Inst-adj/ inst-unadj | |
| --- | --- | --- | --- | --- | --- | --- | --- | --- | --- | --- | --- | --- | --- | --- | --- | --- | --- | --- |
| Angola | 1039851 | | 1065588 | | 1.02 | | 973222 | | 989015 | | 1.02 | | 485081 | | 498965 | | 1.03 | |
| Benin | 694872 | | 694217 | | 1.00 | | 489788 | | 499736 | | 1.02 | | 487933 | | 488085 | | 1.00 | |
| Burkina Faso | 930526 | | 956399 | | 1.03 | | 848438 | | 862212 | | 1.02 | | 768102 | | 784081 | | 1.02 | |
| Cabo Verde | 6435 | | 6439 | | 1.00 | | 6257 | | 6164 | | 0.99 | | 6106 | | 6100 | | 1.00 | |
| Cameroon | 731568 | | 726635 | | 0.99 | | 928765 | | 900510 | | 0.97 | | 493005 | | 496743 | | 1.01 | |
| CAR | 360903 | | 366858 | | 1.02 | | 225605 | | 222628 | | 0.99 | | 227457 | | 233274 | | 1.03 | |
| Chad | 832991 | | 851255 | | 1.02 | | 888018 | | 886425 | | 1.00 | | 504719 | | 474179 | | 0.94 | |
| Cote dIvoire | 973421 | | 980531 | | 1.01 | | 1173609 | | 1160590 | | 0.99 | | 726922 | | 731894 | | 1.01 | |
| DRC | 5350984 | | 5294110 | | 0.99 | | 4840848 | | 4799288 | | 0.99 | | 4984837 | | 4689310 | | 0.94 | |
| Ethiopia | 3927842 | | 4026776 | | 1.03 | | 3831406 | | 3932927 | | 1.03 | | 2869244 | | 2937341 | | 1.02 | |
| Gambia | 85551 | | 85866 | | 1.00 | | 75139 | | 53902 | | 0.72 | | 72471 | | 74808 | | 1.03 | |
| Ghana | 908626 | | 921000 | | 1.01 | | 1207518 | | 1206858 | | 1.00 | | 729061 | | 733904 | | 1.01 | |
| Guinea-Bissau | 58855 | | 31094 | | 0.53 | | 51657 | | 51657 | | 1.00 | | 217609 | | 156718 | | 0.72 | |
| Guinea | 630616 | | 630972 | | 1.00 | | 513610 | | 504505 | | 0.98 | | 459412 | | 441541 | | 0.96 | |
| Kenya | 1468344 | | 1480923 | | 1.01 | | 1387470 | | 1397058 | | 1.01 | | 1208672 | | 1228951 | | 1.02 | |
| Liberia | 210090 | | 210173 | | 1.00 | | 207458 | | 207673 | | 1.00 | | 45280 | | 45351 | | 1.00 | |
| Madagascar | 939705 | | 936580 | | 1.00 | | 1077506 | | 993867 | | 0.92 | | 419646 | | 420770 | | 1.00 | |
| Malawi | 714845 | | 720491 | | 1.01 | | 750663 | | 753981 | | 1.00 | | 601660 | | 587249 | | 0.98 | |
| Mali | 928077 | | 922691 | | 0.99 | | 1052645 | | 1046407 | | 0.99 | | 589082 | | 583344 | | 0.99 | |
| Mozambique | 2133963 | | 2155844 | | 1.01 | | 1490536 | | 1483130 | | 1.00 | | 1393487 | | 1407150 | | 1.01 | |
| Niger | 1079983 | | 1078860 | | 1.00 | | 1168351 | | 1164845 | | 1.00 | | 570915 | | 548441 | | 0.96 | |
| Nigeria | 6565511 | | 6135498 | | 0.93 | | 8811524 | | 8933230 | | 1.01 | | 2600935 | | 2619695 | | 1.01 | |
| Rwanda | 393759 | | 391094 | | 0.99 | | 340425 | | 341127 | | 1.00 | | 337280 | | 337964 | | 1.00 | |
| Senegal | 279860 | | 298338 | | 1.07 | | 485519 | | 506592 | | 1.04 | | 387392 | | 413650 | | 1.07 | |
| Sierra Leone | 316242 | | 318923 | | 1.01 | | 336484 | | 332490 | | 0.99 | | 249665 | | 251926 | | 1.01 | |
| Somalia | 787179 | | 774874 | | 0.98 | | 683582 | | 649544 | | 0.95 | | 131312 | | 135665 | | 1.03 | |
| South Sudan | 474974 | | 475024 | | 1.00 | | 622147 | | 619031 | | 0.99 | | 185776 | | 188472 | | 1.01 | |
| Tanzania | 2716057 | | 2706477 | | 1.00 | | 2601715 | | 2586314 | | 0.99 | | 2186654 | | 2171819 | | 0.99 | |
| Togo | 247691 | | 251148 | | 1.01 | | 315120 | | 315170 | | 1.00 | | 211384 | | 213187 | | 1.01 | |
| Uganda | 2089075 | | 2100423 | | 1.01 | | 2073099 | | 2019838 | | 0.97 | | 1537820 | | 1543494 | | 1.00 | |
| Zambia | 817787 | | 841735 | | 1.03 | | 755853 | | 755295 | | 1.00 | | 630429 | | 644164 | | 1.02 | |
| Zimbabwe | 432887 | | 438458 | | 1.01 | | 470175 | | 459241 | | 0.98 | | 368227 | | 363092 | | 0.99 | |
| **Median** | | **802483** | | **808305** | | **1.0** | | **802146** | | **808754** | | **1** | | **490469** | | **492414** | | **1** |
| **QR1** | | **385545** | | **385035** | | **1.0** | | **437738** | | **429713** | | **1** | | **244113** | | **247263** | | **1** |
| **QR3** | | **1049884** | | **1068906** | | **1.0** | | **1182086** | | **1175348** | | **1** | | **738821** | | **746448** | | **1** |
| **Note:**  Unadj – unadjusted  Adj – adjusted  Inst – DHIS-2 number of institutional live births  Penta1 – DHIS-2 number of Penta 1 does  ANC-1 DHIS-2 number of women received antenatal care | | | | | | | | | | | | | | | | | | |
