# Supplementary material for: Health facility data for monitoring of maternal, newborn and health indicators: a systematic approach applied by 32 countries in sub-Saharan Africa
Source: Research Square preprint supplement (doi:10.21203/rs.3.rs-8505093/v1), 2026-01-29
Supplement: Supplementary file 2 [file 3487275a6ddd5f88a480e5e0.docx]

**Comparison results for similar year survey and DHIS-2 coverage for penta3**

| **Country** | **Survey year** | **DHIS-2 year** | **CD2030**** | **Survey** | **% Points absolute difference** |
| --- | --- | --- | --- | --- | --- |
| Benin | 2022 | 2022 | 70 | 63 | 7 |
| Burkina Faso | 2021 | 2021 | 90 | 91 | 1 |
| Chad | 2023 | 2023 | 77 | 68 | 9 |
| Cote d’Ivoire | 2021 | 2021 | 76 | 77 | 1 |
| DRC | 2023 | 2023 | 77 | 67 | 10 |
| Ethiopia | 2024 | 2024 | 77 | 73 | 4 |
| Ghana | 2022 | 2022 | 101 | 95 | 6 |
| Kenya | 2022 | 2022 | 88 | 89 | 1 |
| Madagascar | 2021 | 2021 | 65 | 60 | 5 |
| Mozambique | 2022 | 2022 | 75 | 70 | 5 |
| Niger | 2021 | 2021 | 90 | 81 | 9 |
| Senegal | 2023 | 2023 | 93 | 89 | 4 |
| Tanzania | 2022 | 2022 | 82 | 83 | 1 |
| The Gambia | 2020 | 2020 | 79 | 80 | 1 |
| Uganda | 2022 | 2022 | 90 | 91 | 1 |
| Zambia | 2024 | 2024 | 92 | 91 | 1 |
| Zimbabwe | 2022 | 2022 | 90 | 91 | 1 |
| CARCAR | 2019 | 2020 | 39 | 42 | 3 |
| Liberia | 2019 | 2020 | 83 | 83 | 0 |
| Malawi | 2019 | 2020 | 89 | 85 | 4 |
| Rwanda | 2019 | 2020 | 98 | 98 | 0 |
| **Median (IQR)** |  |  | **83 (77-90)** | **83 (70-91)** | **3 (1-5)** |
| **** coverage estimates are based Penta-1 used as the denominator** | | | | | |

**Comparison results for similar year survey and DHIS-2 coverage for institutional live births**

| **Country** | **Denominator** | **Survey year** | **DHIS-2 year** | **CD2030** | **Survey** | **% Points absolute difference** |
| --- | --- | --- | --- | --- | --- | --- |
| Benin | UN | 2022 | 2022 | 96 | 91 | 5 |
| Burkina Faso | UN | 2021 | 2021 | 97 | 94 | 3 |
| Chad | ANC1 | 2023 | 2023 | 29 | 27 | 2 |
| Cote D’Ivoire | UN | 2021 | 2021 | 75 | 81 | 6 |
| DRC | Penta-1 | 2023 | 2023 | 77 | 82 | 4 |
| Ethiopia | ANC1 | 2024 | 2024 | 55 | 48 | 8 |
| Ghana | ANC1 | 2022 | 2022 | 82 | 78 | 4 |
| Kenya | Penta-1 | 2022 | 2022 | 83 | 89 | 6 |
| Madagascar | ANC1 | 2021 | 2021 | 39 | 39 | 0 |
| Mozambique | ANC1 | 2022 | 2022 | 56 | 65 | 9 |
| Niger | ANC1 | 2021 | 2021 | 41 | 44 | 3 |
| Senegal | Penta-1 | 2023 | 2023 | 78 | 80 | 3 |
| Tanzania | ANC1 | 2022 | 2022 | 80 | 81 | 2 |
| The Gambia | ANC1 | 2020 | 2020 | 86 | 84 | 2 |
| Uganda | ANC1 | 2022 | 2022 | 74 | 73 | 1 |
| Zambia | Penta-1 | 2024 | 2024 | 78 | 84 | 6 |
| Zimbabwe | ANC1 | 2022 | 2022 | 82 | 86 | 3 |
| CAR | UN | 2019 | 2020 | 60 | 58 | 2 |
| Liberia | UN | 2019 | 2020 | 74 | 80 | 6 |
| Malawi | DHIS-2 population projection | 2023 | 2024 | 95 | 96 | 1 |
| Rwanda | Penta-1 | 2019 | 2020 | 90 | 93 | 3 |
|  | **Median (IQR)** |  |  | **78 (60-83)** | **81 (65-85)** | **3(2-6)** |
