# Supplementary material for: Health facility data for monitoring of maternal, newborn and health indicators: a systematic approach applied by 32 countries in sub-Saharan Africa
Source: Research Square preprint supplement (doi:10.21203/rs.3.rs-8505093/v1), 2026-01-29
Supplement: Supplementary file 3 [file 70da413bea451ee448f4a3fa.docx]

**Table 1: Variation in DHIS-2 data element definitions and disaggregation for institutional delivery and penta-1 vaccination across selected countries**

| **Country** | **Element ID in DHIS-2** | **Element name in DHIS-2** | **Category ID in DHIS-2** | **Constituent categories** |
| --- | --- | --- | --- | --- |
|  |  | **Institutional delivery** |  |  |
| Madagascar | Qi1WRFJoSnU | Nombre Accouchements | wQcVaGUsRp6 | 10 à 14 ans |
|  |  |  | UCHswA40mNi | 18 à 24 ans |
|  |  |  | b39EuNOkecq | 15 à 17 ans |
|  |  |  | jUVRz8lMcaK | Plus de 25 ans |
| Malawi | z0CkmLApd1S | RHD HBB Number of deliveries in health facilities | Tt7fU5lUhAU | Default |
| Sierra Leone | TcBJyWWLJpJ | Delivery by CHO/CHA/SECHN/MCH Aides | HllvX50cXC0 | Default |
|  | g03tqY0hM8Y | Delivery by Doctor/Midwife/SACHO/SECHN Midwife | HllvX50cXC0 | Default |
|  | hJvlU1wOxQc | Delivery by TBAs and Others | HllvX50cXC0 | Default |
| Zimbabwe | SyfZ7GFz0zT | New_HIS T5 - D3 DELIVERY_v2023 |  |  |
| CAR | sqkNJTJMzjv | RMA-CS&PS_Santé de la reproduction (SR) |  |  |
| Uganda | idXOxt69W0e | 105-MA04a. Deliveries in unit – Total | PwuKTzy4vLJ | 15-19Yrs |
|  | idXOxt69W0e | 105-MA04a. Deliveries in unit – Total | QGprPUGJp4N | 25-49Yrs |
|  | idXOxt69W0e | 105-MA04a. Deliveries in unit – Total | JtoaNPpY2BF | <15Yrs |
|  | idXOxt69W0e | 105-MA04a. Deliveries in unit – Total | c9JPAeQh49R | 20-24Yrs |
|  | idXOxt69W0e | 105-MA04a. Deliveries in unit – Total | sxBbkmHxnBP | 50+Yrs |
| **Penta-1** | | | | |
| Madagascar | jB0ZVNgH3MV | PEV 0-11 mois vaccines au Penta (DTC HepB Hib) 1 | ON4YIsxHxP9 | Mobile |
|  |  |  | HeWwmez6nZO | Fixe |
|  |  |  | Z6k78RSeohQ | Avance |
|  | cMN7aHkXHhs | T14: Penta (DTC HepB Hib) 1 | vSyfdg0g5pY | 0 à 11 mois |
|  |  |  | ji2PMOibKbF | 0 à 11 mois , Fixe |
|  |  |  | Haw9ZTVP289 | 0 à 11 mois, Avance |
| Malawi | bUpxQhmf8ZK | CHD EPI DPT-HepB-Hib1 Childhood Vaccination | ipKITPnwlcP | Outreach, Under 1 |
|  | bUpxQhmf8ZK | CHD EPI DPT-HepB-Hib1 Childhood Vaccination | zKLduwqZFnh | Outreach, Over 1 |
|  | bUpxQhmf8ZK | CHD EPI DPT-HepB-Hib1 Childhood Vaccination | r2NJTUrJ2TL | Static, Over 1 |
|  | bUpxQhmf8ZK | CHD EPI DPT-HepB-Hib1 Childhood Vaccination | UHR4d8LgGou | Static, Under 1 |
| Sierra Leone | F63VoBCwxxX | Pentavalent 1st dose | W3JtBBp3Kr7 | Outreach, 0-11m |
|  | F63VoBCwxxX | Pentavalent 1st dose | Okj4tlICMV6 | Outreach, 12-59m |
|  | F63VoBCwxxX | Pentavalent 1st dose | udLu2nFAdSr | Infacility, 0-11m |
|  | F63VoBCwxxX | Pentavalent 1st dose | ISVtqpuihRq | Infacility, 12-59m |
| Zimbabwe | kknRkSprOXG | T5 - Pentavalent 1 | vIP3ko4qPtk | Male, Under 1 Year |
|  | kknRkSprOXG | T5 - Pentavalent 1 | eI0qZaNXfbd | Female, 1 Year + |
|  | kknRkSprOXG | T5 - Pentavalent 1 | w9tQ13TT7sF | Female, Under 1 Year |
| CAR | X0gNwKuy6Y0 | PEV_Penta1 | lM2h8wIjqww | 0-11mois |
| Uganda | Ys31ug5E3f1 | 105-CL08. DPT-HepB+Hib 1 | kBLpiQanUSy | <1Yr, Static |
|  | Ys31ug5E3f1 | 105-CL08. DPT-HepB+Hib 1 | LbCqcOuZipd | <1Yr, Outreach |
