# Supplementary material for: Health facility data for monitoring of maternal, newborn and health indicators: a systematic approach applied by 32 countries in sub-Saharan Africa
Source: Research Square preprint supplement (doi:10.21203/rs.3.rs-8505093/v1), 2026-01-29
Supplement: Supplementary file 4 [file b077e9bf0d006450a42762de.xlsx]

## Sheet: Read_me
				COUNTRY ANALYSIS OF RMNCH & NUTRITION INDICATORS AT DISTRICT LEVEL
					COMPILATION OF HEALTH FACILTY ROUTINE DATA FROM DHIS2
					The data set will be used for analysis to produce statistics to assess health services utilization and national and subnational levels with special reference to reproductive, maternal, newborn and child health. Each country team should compile the required data into this spreadsheet in order to be able to perform the analyses. It is essential to properly complete the spreadsheet according to the …
					GENERAL GUIDANCE TO FILL OUT THE SPREADSHEET WORKSHEETS
					General guidance on how to complete the worksheets: - Please read the headings and worksheet-specific instructions in order to complete the spreadsheet properly. - Complete each worksheet by extracting the relevant data from DHIS2 database for your country. - All spreadsheets require monthly sub-national (district) data from January 2019 to December 2023. - Use this template for data collection a…
					Data will be used for further analysis and to produce coverage estimates. Each country team is required to complete this spreadsheet before the workshop in order to carry out expected analyses during the workshop. It is important to completely and properly fill out each worksheet as they are connected to analysis codes. Please follow worksheet-specific instructions as well this general guidance o…

## Sheet: Data_checks
	Please, fill cells C5, C6, and C7 with information regarding your country and health facility data availability. There remaining cells in column C will be automatically updated according to any errors that might occur. - Grey cells in column C are only informative - Green cells in column C are free of errors - Red cells in column C highlight errors, and suggestions for corrections can be found in…			All the rows below will be automatically updated according to your data once the Excel file is compiled
				District	# of occurrences in 'Admin data'	Is the district missing in 'Population_data'?	# of occurrences in 'Population_data'?	Is the district missing in 'Reporting_completeness'?	# of occurrences in 'Reporting completeness'	Is the district missing in 'Service_data_1'?	# of occurrences in 'Service_data_1'	Is the district missing in 'Service_data_2'?	# of occurrences in 'Service_data_2'
				Name of District 1	1	OK	2	OK	12	OK	12	OK	12
	Type here the expected number of districts in the country:	30		Name of District 2	1	OK	2	OK	12	OK	12	OK	12
	Type here the first year of the data:	2019		Name of District 3	1	OK	2	CHECK	0	CHECK	0	CHECK	0
	Type here the last year of the data:	2023		Name of District 4	1	OK	2	CHECK	0	CHECK	0	CHECK	0
				Name of District 5	1	OK	2	CHECK	0	CHECK	0	CHECK	0
	Expected number of month/year/district data points	60		Name of District 6	1	OK	2	CHECK	0	CHECK	0	CHECK	0
	Expected number of year/district data points	5		up to the last district	1	OK	2	CHECK	0	CHECK	0	CHECK	0
	Number of districts in 'Admin_data' sheet:	7
	Is the number of districts different from expected?	CHECK
	Are there any duplicated districts in 'Admin_data' sheet?	OK
	Missing year/district in 'Population_data'?	CHECK
	Duplicate year/district in 'Population_data'?	OK
	Missing month/year/district in 'Reporting_completeness'?	CHECK
	Duplicate month/year/district in 'Reporting_completeness'?	OK
	Missing month/year/district in 'Service_data_1'?	CHECK
	Duplicate month/year/district in 'Service_data_1'?	OK
	Missing month/year/district in 'Service_data_2'?	CHECK
	Duplicate month/year/district in 'Service_data_2'?	OK
	Number of districts in each year	year
	7	2019
	7	2020
	0	2021
	0	2022
	1	2023

## Sheet: Admin_data
Num_order		District_name	First_admin_level	Country	Number_hospitals	Number_hcenters	Total_number_health_facilities	Number_pfacilities_profit	Number_pfacilities_nonprofit	Total_physicians	Total_nurses_midwives	Total_nonclinique_physicians	Number_hospital_beds
		This sheet serves to map Health districts (C) to administrative units (D) and other health system data. Please fill in the information for each column starting from Column C. Health division units name (districts) in Column C should be unique, while it is possible that a set of districts (C) correspond to the same administrative unit (D). CAUTION: The order and names of health division units (dis…
Nº		District	Region	Your_country_name	Total number of hospitals (based on country definition)	Total number of health centres (non-hospitals; based on country definition)	Total number of health facilities (all types/categories)	Total number of health facilities that are private-for-profit	Total number of health facilities that are private-non-profit	Total number of physicians	Total number of nurses / midwives	Total number of non-clincian physicians	Number of hospital beds
1		Name of District 1	Name of of the upper administrative level (e.g. Name of Region) to which belong District 1	Your_country_name
2		Name of District 2	Name of of the upper administrative level (e.g. Name of Region) to which belong District 2	Your_country_name
3		Name of District 3	Name of of the upper administrative level (e.g. Name of Region) to which belong District 3	Your_country_name
4		Name of District 4	Name of of the upper administrative level (e.g. Name of Region) to which belong District 4	Your_country_name
5		Name of District 5	Name of of the upper administrative level (e.g. Name of Region) to which belong District 5	Your_country_name
6		Name of District 6	Name of of the upper administrative level (e.g. Name of Region) to which belong District 6	Your_country_name
7		up to the last district
8
9
10
11
12
13
14
15
16
17
18
19
20
21
22
23
24
25
26
27
28
29
30

## Sheet: Population_data
District_name	Year	Pop_growth_rate	Total_Population	Population_ under_5years	Population_under_1year	Live_births	Total_births	Women_15_49_years
In this sheet, you will compile official population data used to produce denominators by the routine health information system in your country. These data are integrated into DHIS2 or other routine health data collection systems, and are usually derived from projections by the country's institute of statistics and/or demographic. Please enter data by district and year from year 2019 to 2023. WARN…
District name	Year	Annual Population growth rate	Total Population	Population under 5 years	Population under 1 year	Total Live births	Total births	Total women 15-49 years
Name of District 1	2019
Name of District 2	2019
Name of District 3	2019
Name of District 4	2019
Name of District 5	2019
Name of District 6	2019
up to the last district	2019
Name of District 1	2020
Name of District 2	2020
Name of District 3	2020
Name of District 4	2020
Name of District 5	2020
Name of District 6	2020
up to the last district	2020
repeat until year	2023

## Sheet: Reporting_completeness
District	Year	Month	ANC_reporting_expected	ANC_reporting_received	ANC_reporting_rate	Instdelivey_reporting_expected	Instdelivey_reporting_received	Instdelivey_reporting_rate	Vacc_reporting_expected	Vacc_reporting_received	Vacc_reporting_rate	OPD_reporting_expected	OPD_reporting_received	OPD_reporting_rate	IPD_reporting_expected	IPD_reporting_received	IPD_reporting_rate
District name	Year	Month	ANC reporting			Institutional delivery reporting			Vaccinations reporting			OPD visits reporting			IPD admissions reporting
			Expected number (#)	Received number (#)	Reporting completeness rate (%)	Expected number (#)	Received number (#)	Reporting completeness rate (%)	Expected number (#)	Received number (#)	Reporting completeness rate (%)	Expected number (#)	Received number (#)	Reporting completeness rate (%)	Expected number (#)	Received number (#)	Reporting completeness rate (%)
Name of district 1	2019	January
Name of district 1	2019	February
Name of district 1	2019	March
Name of district 1	2019	April
Name of district 1	2019	May
Name of district 1	2019	June
Name of district 1	2019	July
Name of district 1	2019	August
Name of district 1	2019	September
Name of district 1	2019	October
Name of district 1	2019	November
Name of district 1	2019	December
Name of district 2	2019	January
Name of district 2	2019	February
Name of district 2	2019	March
Name of district 2	2019	April
Name of district 2	2019	May
Name of district 2	2019	June
Name of district 2	2019	July
Name of district 2	2019	August
Name of district 2	2019	September
Name of district 2	2019	October
Name of district 2	2019	November
Name of district 2	2019	December
until all districts have data for all years and months
...
Name of last district	2023	November
Name of last district	2023	December

## Sheet: Service_data_1
District	Year	Month	ANC1	ANC_1trimester	ANC4	IPT2	IPT3	IFA90	Syphilis_test	HIV_test	SBA	Instdelivery	Instlivebirths	Csection	Low_BWeight	PNC_48h	Stillbirth_total	Stillbirth_fresh	Stillbirth_macerated	maternal_deaths	neonatal_deaths
			Enter the reported number of individuals that received the specific service for each month and by subnational unit (district). CAUTION: The name and order of districts SHOULD BE the same across all the sheets. Do not create a new column or displace an existing column. Do not enter any data beyond the total number of health subnational units in your country. Please use "PASTE SPECIAL" and paste "O…
District name	Year	Month	Total number of ANC 1st visit	Total number of ANC during the 1st trimester of pregnancy	Total number of Pregnant women completing 4 ANC visits	Total number of pregnant women receiving IPT 2nd dose	Total number of pregnant women receiving IPT 3rd dose	Total number of pregnant women who received iron folic acid (IFA) supplementation for 90 or more days during the pregnancy	Total number of pregnant women tested for syphilis during pregnancy	Total number of pregnant women tested for HIV during pregnancy	Total number of skilled birth attendance in health facilities	Total number of deliveries in health facilities	Total number of live births in health facilities	Total number of Caesarian Sections	Total number of newborns with low birth weight (<2500g)	Total number of mothers attending PNC visit within 48 hours after delivery	Total number of stillbirths in health facilities (all)	Total number of fresh stillbirths in health facilities	Total number of macerated stillbirths in health facilities	Total number of maternal deaths reported	Total number of neonatal deaths reported
Name of district 1	2019	January
Name of district 1	2019	February
Name of district 1	2019	March
Name of district 1	2019	April
Name of district 1	2019	May
Name of district 1	2019	June
Name of district 1	2019	July
Name of district 1	2019	August
Name of district 1	2019	September
Name of district 1	2019	October
Name of district 1	2019	November
Name of district 1	2019	December
Name of district 2	2019	January
Name of district 2	2019	February
Name of district 2	2019	March
Name of district 2	2019	April
Name of district 2	2019	May
Name of district 2	2019	June
Name of district 2	2019	July
Name of district 2	2019	August
Name of district 2	2019	September
Name of district 2	2019	October
Name of district 2	2019	November
Name of district 2	2019	December
until all districts have data for all years and months
...
Name of last district	2023	November
Name of last district	2023	December

## Sheet: Service_data_2
District	Year	Month	BCG	Penta1	Penta3	Measles1	Measles2	OPD_total	OPD_under5	IPD_total	IPD_under5	under5_deaths	total_deaths
			Enter the reported number of individuals that received the specific service for each month and by subnational unit (district). CAUTION: The name and order of districts SHOULD BE the same across all the sheets. Do not create a new column or displace an existing column. Do not enter any data beyond the total number of health subnational units in your country. Please use "PASTE SPECIAL" and paste "O…
District name	Year	Month	Total number of BCG doses administered <1 year	Total number of Pentavalent vaccination 1st dose (infants)	Total number of Pentavalent vaccination 3rd dose (infants)	Total number of Measles vaccination 1st dose (infants)	Total number of Measles vaccination 2nd dose	Total number of OPD visits all ages (new and re-visit)	Number of OPD visits for children under-5 years	Total number of IPD admissions, all ages	Number of IPD admissions of children under-5 years	Total number of under-5 deaths in health facilities	Total number of all age deaths in health facilities
Name of district 1	2019	January
Name of district 1	2019	February
Name of district 1	2019	March
Name of district 1	2019	April
Name of district 1	2019	May
Name of district 1	2019	June
Name of district 1	2019	July
Name of district 1	2019	August
Name of district 1	2019	September
Name of district 1	2019	October
Name of district 1	2019	November
Name of district 1	2019	December
Name of district 2	2019	January
Name of district 2	2019	February
Name of district 2	2019	March
Name of district 2	2019	April
Name of district 2	2019	May
Name of district 2	2019	June
Name of district 2	2019	July
Name of district 2	2019	August
Name of district 2	2019	September
Name of district 2	2019	October
Name of district 2	2019	November
Name of district 2	2019	December
until all districts have data for all years and months
...
Name of last district	2023	November
Name of last district	2023	December
